# Supplementary material for: Flp, a Fis‐like protein, contributes to the regulation of type III secretion and virulence processes in the phytopathogen Xanthomonas campestris pv. campestris
Source: PubMed Central journal article supplement (PMC6640185; doi:10.1111/mpp.12818), 2019-05-14
Supplement: MPP-20-1119-s001.pdf [file MPP-20-1119-s001.pdf]

|                                            |      |                                                     |
|--------------------------------------------|------|-----------------------------------------------------|
| Xanthomonas campestris pv. campestris 8004 | (1)  | -----MNAAPSRPDS SRGAPKSP LREHVAQSVRRYLRLDLDGSDADD   |
| Pseudomonas aeruginosa                     | (1)  | MFEQRVNSDVLTVATVNSQDQVTQKPLRDSVKQALKNYFAQLNGQDVND   |
| yersinia pseudotuberculosis                | (1)  | MFEQRVNSDVLTVATVNSQDQVTQKPLRDSVKQALKNYFAQLNGQDVSD   |
| Escherichia coli                           | (1)  | MFEQRVNSDVLTVSTVNSQDQVTQKPLRDSVKQALKNYFAQLNGQDVND   |
| Dickeya zeae                               | (1)  | MFEQRVNSDVLTVSTVNSQAQVTQKPLRDSVKQALKNYFAQLNGQDVND   |
|                                            |      |                                                     |
| Xanthomonas campestris pv. campestris 8004 | (43) | VYEIVLREMEIPIFVEVLNHCEGNQSRAAAMLGTHRATLRKKLKEYGLT   |
| Pseudomonas aeruginosa                     | (51) | LYELVLA EVEQPLLDMMVMQYTRGNQTRAALMMGINRGTLRKKLKKYGMN |
| yersinia pseudotuberculosis                | (51) | LYELVLA EVEQPLLDMMVMQYTRGNQTRAALMMGINRGTLRKKLKKYGMN |
| Escherichia coli                           | (51) | LYELVLA EVEQPLLDMMVMQYTRGNQTRAALMMGINRGTLRKKLKKYGMN |
| Dickeya zeae                               | (51) | LYELVLA EVEQPLLDMMVMQYTRGNQTRAALMMGINRGTLRKKLKKYGMN |

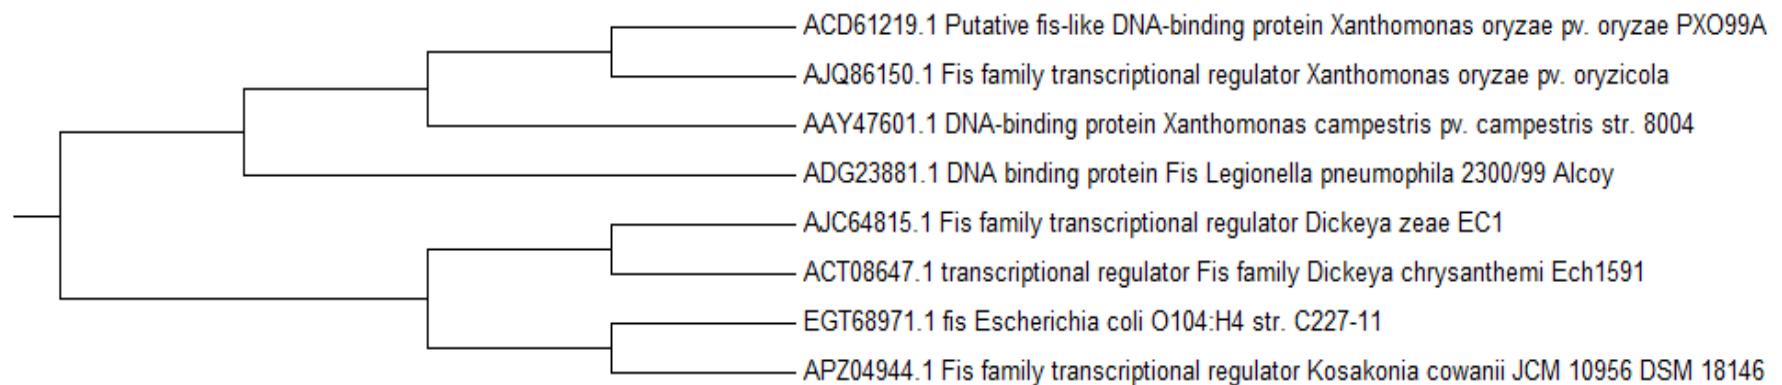

Fig. S1
